# Supplementary material for: Structure and thermodynamics of empty clathrate hydrates below the freezing point of water
Source: Royal Society of Chemistry journal article supplement (doi:10.1039/d1cp00893e), 2021-01-01
Supplement: d1cp00893e1.pdf [file d1cp00893e1.pdf]

# *Structure and Thermodynamics of Empty Clathrate*

## *Hydrates Below the Freezing Point of Water*

*Fernando J.A.L. Cruz\* and José P.B. Mota*

LAQV-REQUIMTE, Department of Chemistry, Faculdade de Ciências e Tecnologia, NOVA  
University Lisbon, 2829-516 Caparica, Portugal.

\*fj.cruz@fct.unl.pt

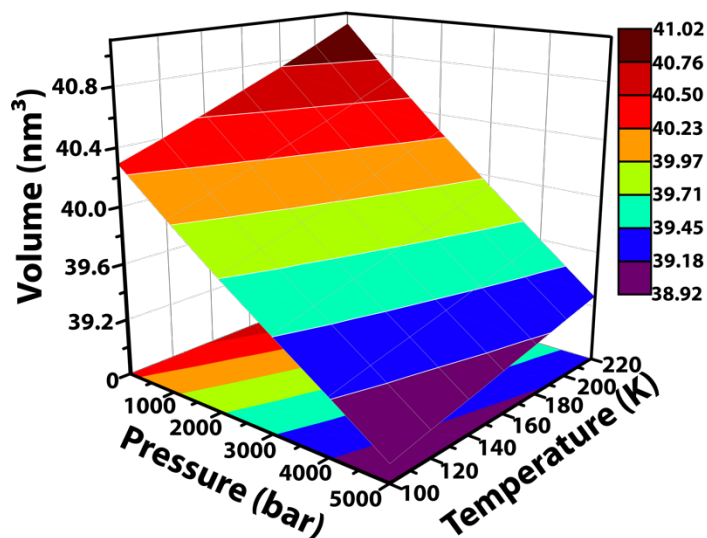

**Figure S11.** Thermodynamical  $p$ - $V$ - $T$  surface of the empty *sII* clathrates, in the ranges  $100 \leq T$  (K)  $\leq 220$  K and  $p \leq 5000$  bar.

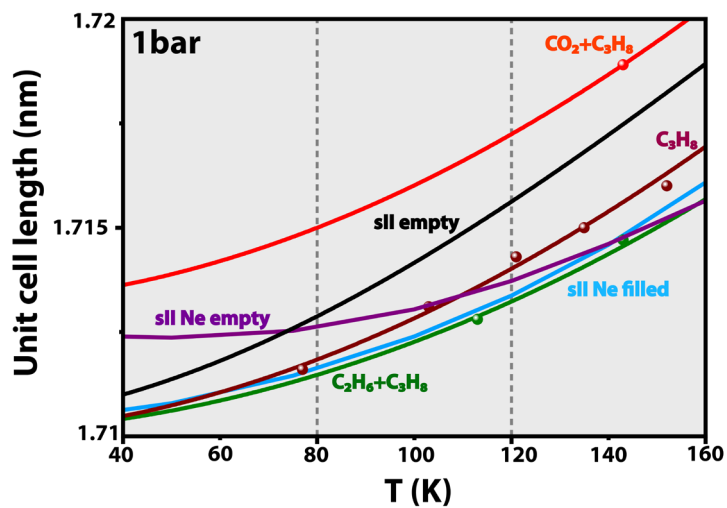

**Figure S12.** Magnification of Figure 3b) in the range  $40 \leq T$  (K)  $\leq 160$ .

**Table S11.** Parameters of the Shomate equation employed to model  $C_p = A + Bp + Cp^2 + Dp^3$ .

| $C_p$ (kJ·K <sup>-1</sup> ·mol <sup>-1</sup> ) | $sI$                       | $sII$                      | $Ih$                       |
|------------------------------------------------|----------------------------|----------------------------|----------------------------|
| $A$                                            | 0.05387                    | 0.05398                    | 0.02552                    |
| $B$                                            | $-3.5388 \times 10^{-8}$   | $-1.54546 \times 10^{-7}$  | $6.27072 \times 10^{-7}$   |
| $C$                                            | $8.30304 \times 10^{-11}$  | $4.48321 \times 10^{-11}$  | $-1.85816 \times 10^{-10}$ |
| $D$                                            | $-4.60746 \times 10^{-14}$ | $-5.06250 \times 10^{-15}$ | $1.85929 \times 10^{-14}$  |
